# Supplementary material for: Fast preparation of adhesive, anti-freezing hydrogels with strain- and magnetic-responsive conductivities
Source: Royal Society of Chemistry journal article supplement (doi:10.1039/d4ma00642a), 2024-01-01
Supplement: d4ma00642a1.pdf [file d4ma00642a1.pdf]

## Supporting Information

### Fast preparation of adhesive, anti-freezing hydrogels with strain- and magnetic-responsive conductivities

Xinyu He<sup>a,b</sup>, Xinyi Huang<sup>a,b</sup>, Shuai He<sup>a,b</sup>, Wei Zhang<sup>a,b</sup>, Xinhua Li<sup>a,b</sup>, Yong You<sup>a,b\*</sup> and Fang Zuo<sup>a,b\*</sup>

a. College of Chemistry & Environment, Southwest Minzu University, Chengdu 610041, China.

b. Key Laboratory of Pollution Control Chemistry and Environmental Functional Materials for Qinghai-Tibet Plateau of the National Ethnic Affairs Commission, Southwest Minzu University, Chengdu 610041, China.

#### **This File Includes:**

Supplementary Figures S1 to S2

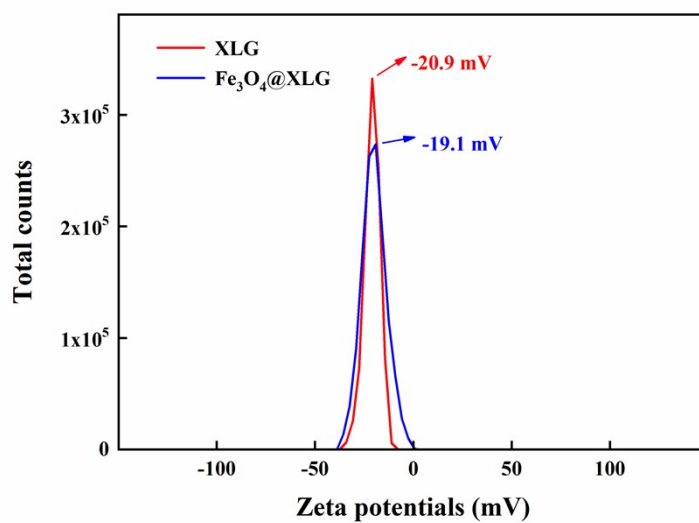

**Figure S1** The zeta potentials of XLG and Fe<sub>3</sub>O<sub>4</sub>@XLG NPs.

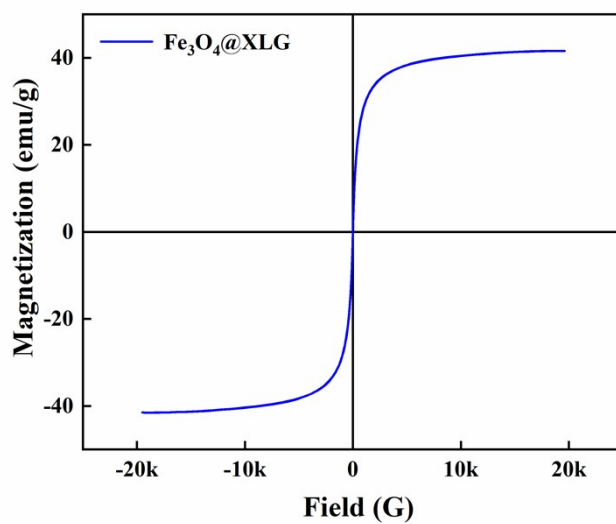

**Figure S2** The VSM curve of Fe<sub>3</sub>O<sub>4</sub>@XLG NPs.
